# Supplementary material for: Synthesis, structures, magnetic, and theoretical investigations of layered Co and Ni thiocyanate coordination polymers
Source: Royal Society of Chemistry journal article supplement (doi:10.1039/c6dt03752f), 2016-01-01
Supplement: c6dt03752f1.pdf [file c6dt03752f1.pdf]

## Supplemental Material

### Synthesis, structures, magnetic, and theoretical investigations of layered Co and Ni thiocyanate coordination polymers

Stefan Suckert, Michał Rams, Michael Böhme, Luzia S. Germann, Robert E. Dinnebier, Winfried Plass, Julia Werner and Christian Näther

#### Content

|          |                                                                                                                                                                                                               |    |
|----------|---------------------------------------------------------------------------------------------------------------------------------------------------------------------------------------------------------------|----|
| Table S1 | Selected crystal data for compounds <b>1-Ni</b> and <b>2-Ni</b> obtained from single crystal-ray analysis.                                                                                                    | 3  |
| Table S2 | Selected crystal data and details of the Rietveld refinements for compounds <b>2-Co</b> and <b>2-Ni</b> .                                                                                                     | 4  |
| Fig. S1  | Experimental and calculated XRPD pattern of <b>1-Co</b> .                                                                                                                                                     | 5  |
| Fig. S2  | Experimental and calculated XRPD patterns of <b>1-Ni</b> .                                                                                                                                                    | 5  |
| Fig. S3  | IR spectrum of <b>2-Co</b> .                                                                                                                                                                                  | 6  |
| Fig. S4  | IR spectrum of <b>2-Ni</b> .                                                                                                                                                                                  | 7  |
| Fig. S5  | IR spectrum of <b>1-Co</b> .                                                                                                                                                                                  | 7  |
| Fig. S6  | IR spectrum of <b>1-Ni</b> .                                                                                                                                                                                  | 7  |
| Table S3 | Selected bond lengths and angles for <b>2-Ni</b> .                                                                                                                                                            | 8  |
| Fig. S7  | ORTEP plot of <b>2-Ni</b> .                                                                                                                                                                                   | 8  |
| Fig. S8  | XRPD patterns of <b>2-Ni</b> calculated from the Rietveld refinement, experimental XRPD pattern of <b>2-Ni</b> and XRPD pattern of <b>2-Ni</b> calculated from crystal data at room temperature and at 170 K. | 9  |
| Fig. S9  | Difference plot for <b>2-Ni</b> .                                                                                                                                                                             | 9  |
| Fig. S10 | Difference plot for <b>2-Co</b> .                                                                                                                                                                             | 10 |
| Fig. S11 | Experimental and calculated XRPD patterns of <b>2-Co</b> .                                                                                                                                                    | 10 |
| Fig. S12 | Heating rate dependent TG measurements for <b>1-Co</b> .                                                                                                                                                      | 11 |
| Fig. S13 | Experimental XRPD patterns of <b>1-Co</b> , the residue obtained after the first mass step of <b>1-Co</b> , and the calculated XRPD pattern of <b>2-Co</b> .                                                  | 11 |
| Fig. S14 | Experimental XRPD patterns of the residue obtained after the second mass step of <b>1-Co</b> , and the calculated XRPD pattern of <b>2-Co</b> .                                                               | 12 |
| Fig. S15 | IR spectra of the residue obtained after the second mass step of <b>1-Co</b> .                                                                                                                                | 12 |
| Fig. S16 | Temperature dependent XRPD measurement for <b>1-Co</b> .                                                                                                                                                      | 13 |

|          |                                                                                                                                                                                               |    |
|----------|-----------------------------------------------------------------------------------------------------------------------------------------------------------------------------------------------|----|
| Fig. S17 | Heating rate dependent TG measurements for <b>1-Ni</b> .                                                                                                                                      | 13 |
| Fig. S18 | Experimental XRPD patterns of <b>1-Ni</b> , the residue obtained after the first mass step of <b>1-Ni</b> and the calculated XRPD pattern of <b>2-Ni</b> .                                    | 14 |
| Fig. S19 | Temperature dependent XRPD measurement for <b>1-Ni</b> .                                                                                                                                      | 14 |
| Fig. S20 | The in-phase component $\chi'$ of AC susceptibility measured for <b>2-Ni</b> using different AC frequencies.                                                                                  | 15 |
| Fig. S21 | The out-of-phase component $\chi''$ of AC susceptibility measured for <b>2-Ni</b> using different AC frequencies.                                                                             | 15 |
| Fig. S22 | AC susceptibility measured for <b>2-Co</b> .                                                                                                                                                  | 16 |
| Fig. S23 | Experimental and calculated XRPD pattern for 2D $[\text{Co}(\text{NCS})_2(4\text{-acetylpyridine})_2]_n$ .                                                                                    | 16 |
| Fig. S24 | IR spectra for 2D $[\text{Co}(\text{NCS})_2(4\text{-acetylpyridine})_2]_n$ .                                                                                                                  | 17 |
| Fig. S25 | Magnetic susceptibility as function of temperature of $\text{Co}(\text{NCS})_2(4\text{-acetylpyridine})_2]_n$ measured at 100 and 1000 Oe.                                                    | 17 |
| Fig. S26 | AC susceptibility as function of temperature of $\text{Co}(\text{NCS})_2(4\text{-acetylpyridine})_2]_n$ measured at frequencies from 10 to 1000 Hz.                                           | 18 |
| Fig. S27 | Magnetization measurements of $\text{Co}(\text{NCS})_2(4\text{-acetylpyridine})_2]_n$ at different temperatures.                                                                              | 18 |
| Fig. S28 | View of the stacking of two layers in 2D $[\text{Co}(\text{NCS})_2(4\text{-acetylpyridine})_2]_n$ .                                                                                           | 19 |
| Fig. S29 | CDFT Computational models for <b>2-Ni</b> and <b>2-Co</b> .                                                                                                                                   | 20 |
| Table S4 | CDFT Results for <b>2-Ni</b> and <b>2-Co</b> .                                                                                                                                                | 20 |
| Fig. S30 | CDFT spin densities for <b>2-Ni</b> .                                                                                                                                                         | 21 |
| Fig. S31 | CDFT spin densities for <b>2-Co</b> .                                                                                                                                                         | 22 |
| Fig. S32 | <i>Ab initio</i> computational model for <b>2-Ni</b> .                                                                                                                                        | 23 |
| Table S5 | Relative CASSCF and CASPT2 energies for <b>2-Ni</b> and <b>2-Co</b> .                                                                                                                         | 24 |
| Table S6 | Relative RASSI-SO energies for the lowest spin-orbit coupled states in <b>2-Ni</b> and <b>2-Co</b> .                                                                                          | 24 |
| Fig. S33 | <i>Ab initio</i> calculated ( $S_{\text{eff}}=1/2$ ) magnetic axes for the first excited KD state of <b>2-Co</b> projected onto a dinuclear Co(II) fragment.                                  | 25 |
| Fig. S34 | <i>Ab initio</i> calculated ( $S_{\text{eff}}=3/2$ ) anisotropy axes for the two lowest KD states of <b>2-Co</b> projected onto a dinuclear Co(II) fragment.                                  | 25 |
| Fig. S35 | Magnetization blocking barriers in <b>2-Co</b> .                                                                                                                                              | 26 |
| Fig. S36 | Deformed chicken-wire lattice of exchange interaction paths between $S = 1$ spins of Ni(II), as used in quantum Monte Carlo simulations to calculate magnetic susceptibility of <b>2-Ni</b> . | 26 |

Table S1. Selected crystal data for compounds **1-Ni** and **2-Ni** obtained by single crystal X-ray analysis.

| Compound                                                                     | <b>1-Ni</b>                                                                    | <b>2-Ni</b>                                                                    |
|------------------------------------------------------------------------------|--------------------------------------------------------------------------------|--------------------------------------------------------------------------------|
| Formula                                                                      | C <sub>34</sub> H <sub>36</sub> N <sub>6</sub> NiO <sub>8</sub> S <sub>2</sub> | C <sub>18</sub> H <sub>18</sub> N <sub>4</sub> NiO <sub>4</sub> S <sub>2</sub> |
| MW / g mol <sup>-1</sup>                                                     | 779.52                                                                         | 477.19                                                                         |
| Crystal system                                                               | Monoclinic                                                                     | Monoclinic                                                                     |
| Space group                                                                  | <i>P</i> 2 <sub>1</sub>                                                        | <i>P</i> 2 <sub>1</sub> /c                                                     |
| <i>a</i> / Å                                                                 | 11.0327(3)                                                                     | 14.8063(9)                                                                     |
| <i>b</i> / Å                                                                 | 14.2185(3)                                                                     | 9.5965(3)                                                                      |
| <i>c</i> / Å                                                                 | 11.9259(4)                                                                     | 15.7820(8)                                                                     |
| $\alpha$ / °                                                                 | 90                                                                             | 90                                                                             |
| $\beta$ / °                                                                  | 95.618(2)                                                                      | 113.010(4)                                                                     |
| $\gamma$ / °                                                                 | 90                                                                             | 90                                                                             |
| <i>V</i> / Å <sup>3</sup>                                                    | 1861.81(9)                                                                     | 2064.03(18)                                                                    |
| <i>T</i> / K                                                                 | 170                                                                            | 200                                                                            |
| <i>Z</i>                                                                     | 2                                                                              | 4                                                                              |
| <i>D</i> <sub>calc</sub> / g cm <sup>-3</sup>                                | 1.390                                                                          | 1.536                                                                          |
| $\mu$ / mm <sup>-1</sup>                                                     | 0.690                                                                          | 1.175                                                                          |
| $\theta_{\text{max}}$ / deg                                                  | 27.350                                                                         | 27.242                                                                         |
| Measured refl.                                                               | 27836                                                                          | 29475                                                                          |
| Unique refl.                                                                 | 8365                                                                           | 4603                                                                           |
| Refl. [ <i>F</i> <sub>0</sub> > 4σ( <i>F</i> <sub>0</sub> )]                 | 7689                                                                           | 3878                                                                           |
| Parameter                                                                    | 502                                                                            | 353                                                                            |
| <i>R</i> <sub>int</sub>                                                      | 0.0528                                                                         | 0.0741                                                                         |
| <i>R</i> <sub>1</sub> [ <i>F</i> <sub>0</sub> > 4σ( <i>F</i> <sub>0</sub> )] | 0.0305                                                                         | 0.0497                                                                         |
| <i>wR</i> <sub>2</sub> [all data]                                            | 0.0767                                                                         | 0.1162                                                                         |
| GOF                                                                          | 1.064                                                                          | 1.084                                                                          |
| $\Delta\rho_{\text{max}}, \Delta\rho_{\text{min}}$ / e Å <sup>-3</sup>       | 0.269/ −0.320                                                                  | 0.391/ −0.464                                                                  |

Table S2. Selected crystal data and details of the Rietveld refinements for compounds **2-Co** and **2-Ni**.

| Compound                               | <b>2-Co</b>                                                                    | <b>2-Ni</b>                                                                    |
|----------------------------------------|--------------------------------------------------------------------------------|--------------------------------------------------------------------------------|
| Formula                                | C <sub>18</sub> H <sub>18</sub> N <sub>4</sub> CoO <sub>4</sub> S <sub>2</sub> | C <sub>18</sub> H <sub>18</sub> N <sub>4</sub> NiO <sub>4</sub> S <sub>2</sub> |
| MW / g mol <sup>-1</sup>               | 477.03                                                                         | 477.19                                                                         |
| Crystal system                         | Monoclinic                                                                     | Monoclinic                                                                     |
| Space group                            | <i>P</i> 2 <sub>1</sub> /c                                                     | <i>P</i> 2 <sub>1</sub> /c                                                     |
| a / Å                                  | 14.9459(9)                                                                     | 15.0197(8)                                                                     |
| b / Å                                  | 9.6273(5)                                                                      | 9.6159(4)                                                                      |
| c / Å                                  | 15.9668(9)                                                                     | 15.7634(8)                                                                     |
| α / °                                  | 90                                                                             | 90                                                                             |
| β / °                                  | 112.032(4)                                                                     | 109.764(4)                                                                     |
| γ / °                                  | 90                                                                             | 90                                                                             |
| V / Å <sup>3</sup>                     | 2129.7(2)                                                                      | 2142.56(19)                                                                    |
| T / K                                  | 293(2)                                                                         | 293(2)                                                                         |
| Z                                      | 4                                                                              | 4                                                                              |
| D <sub>calc</sub> / g cm <sup>-3</sup> | 1.432                                                                          | 1.479                                                                          |
| μ / mm <sup>-1</sup>                   | 1.058                                                                          | 1.1760                                                                         |
| λ / Å                                  | 0.7093                                                                         | 0.7093                                                                         |
| θ <sub>max</sub> / deg                 | 2 to 60                                                                        | 2 to 60                                                                        |
| R <sub>wp</sub> / % <sup>[a]</sup>     | 4.81                                                                           | 5.21                                                                           |
| R <sub>p</sub> / % <sup>[a]</sup>      | 3.60                                                                           | 3.80                                                                           |
| R <sub>exp</sub> / % <sup>[a]</sup>    | 1.55                                                                           | 1.27                                                                           |
| R <sub>Bragg</sub> / % <sup>[a]</sup>  | 2.26                                                                           | 2.53                                                                           |

<sup>[a]</sup> as defined in TOPAS 5.0

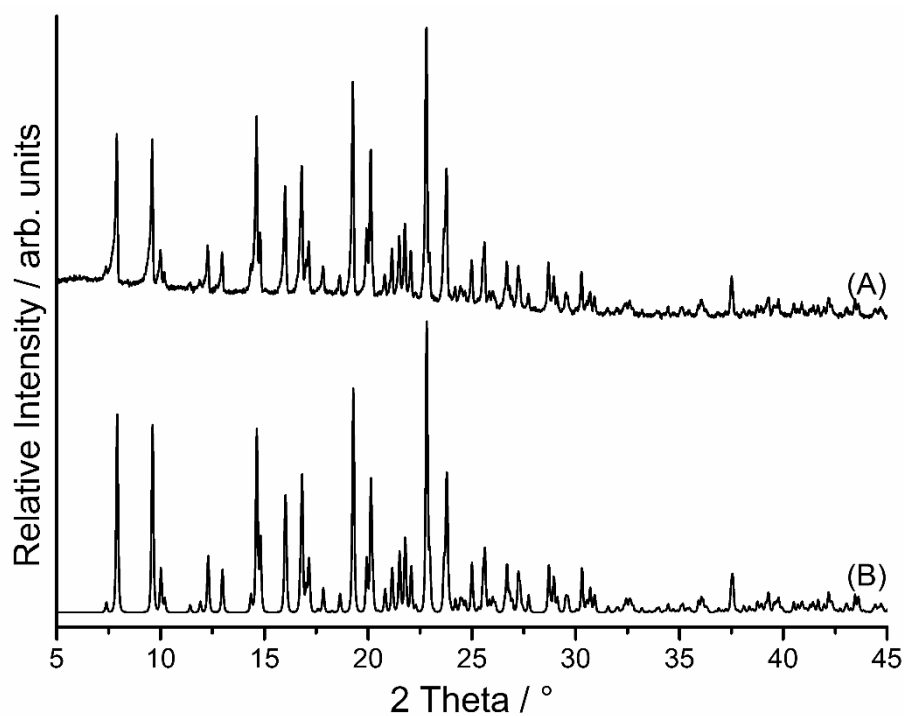

Fig. S1. Experimental (A) and calculated (B) XRPD pattern of **1-Co** ( $\lambda = 1.540596 \text{ \AA}$ ).

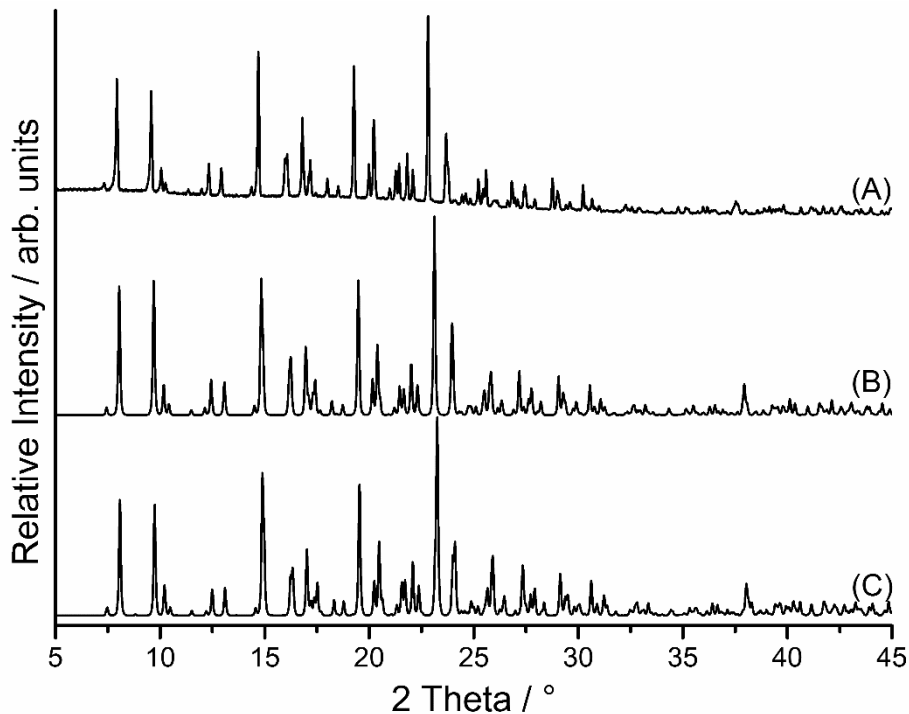

Fig. S2. Experimental (A) and calculated XRPD patterns of **1-Ni** obtained from a new single crystal structure determination at room-temperature (B) and from literature (C) ( $\lambda = 1.540596 \text{ \AA}$ ).

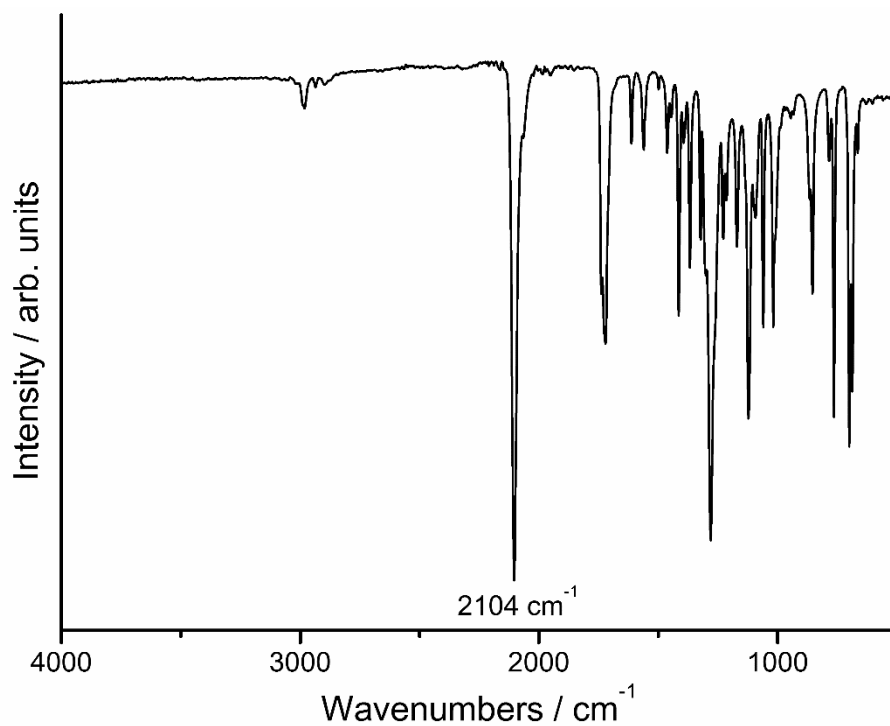

Fig. S3. IR spectrum of **2-Co**. Given is the value for the CN stretching vibration of the thiocyanato anion.

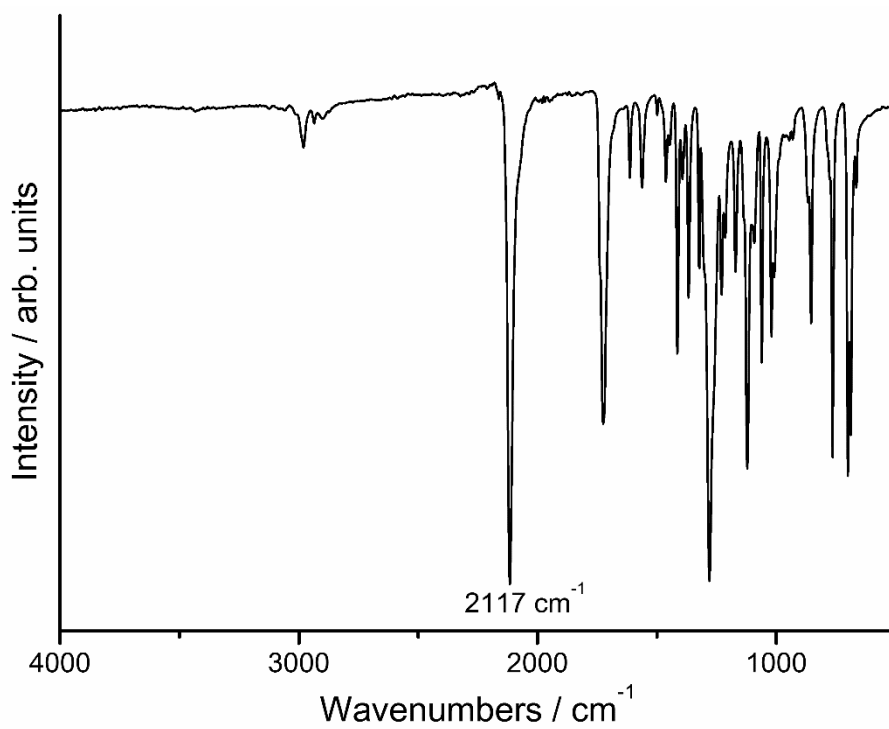

Fig. S4. IR spectrum of **2-Ni**. Given is the value for the CN stretching vibration of the thiocyanato anion.

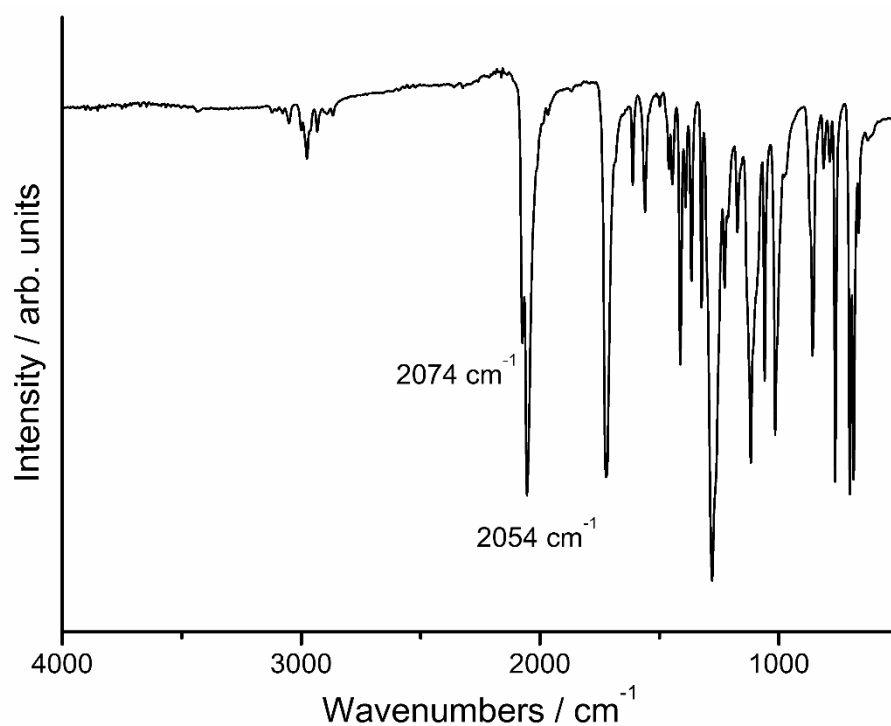

Fig. S5. IR spectrum of **1-Co**. Given are the values for the CN stretching vibrations of the thiocyanato anion.

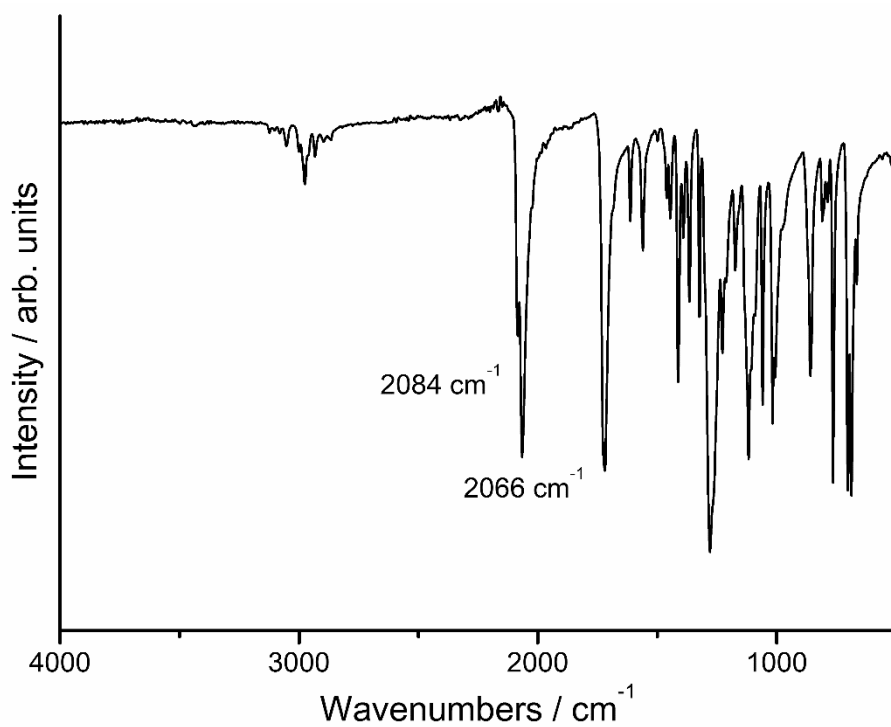

Fig. S6. IR spectrum of **1-Ni**. Given are the values for the CN stretching vibrations of the thiocyanato anion.

Table S3: Selected bond lengths and angles for **2-Ni**.

| Ni(NCS) <sub>2</sub> (4-ethylisonicotinate) <sub>2</sub> |            |                  |            |
|----------------------------------------------------------|------------|------------------|------------|
| Ni(1)–N(2A)                                              | 2.043(2)   | Ni(1)–N(11)      | 2.124(3)   |
| Ni(1)–N(1B)                                              | 2.045(2)   | Ni(1)–S(2)       | 2.4896(10) |
| Ni(1)–N(21)                                              | 2.102(3)   | Ni(1)–S(1)       | 2.5568(10) |
| N(2A)–Ni(1)–N(1B)                                        | 175.97(10) | N(21)–Ni(1)–S(2) | 90.29(8)   |
| N(2A)–Ni(1)–N(21)                                        | 90.26(11)  | N(11)–Ni(1)–S(2) | 89.60(8)   |
| N(1A)–Ni(1)–N(21)                                        | 91.29(10)  | N(2A)–Ni(1)–S(1) | 85.93(8)   |
| N(2A)–Ni(1)–N(11)                                        | 89.93(11)  | N(1B)–Ni(1)–S(1) | 90.35(8)   |
| N(1A)–Ni(1)–N(11)                                        | 88.54(11)  | N(21)–Ni(1)–S(1) | 90.01(8)   |
| N(21)–Ni(1)–N(11)                                        | 179.79(11) | N(11)–Ni(1)–S(1) | 90.11(8)   |
| N(2A)–Ni(1)–S(2)                                         | 91.06(8)   | S(2)–Ni(1)–S(1)  | 176.98(3)  |
| N(1B)–Ni(1)–S(2)                                         | 92.66(8)   |                  |            |

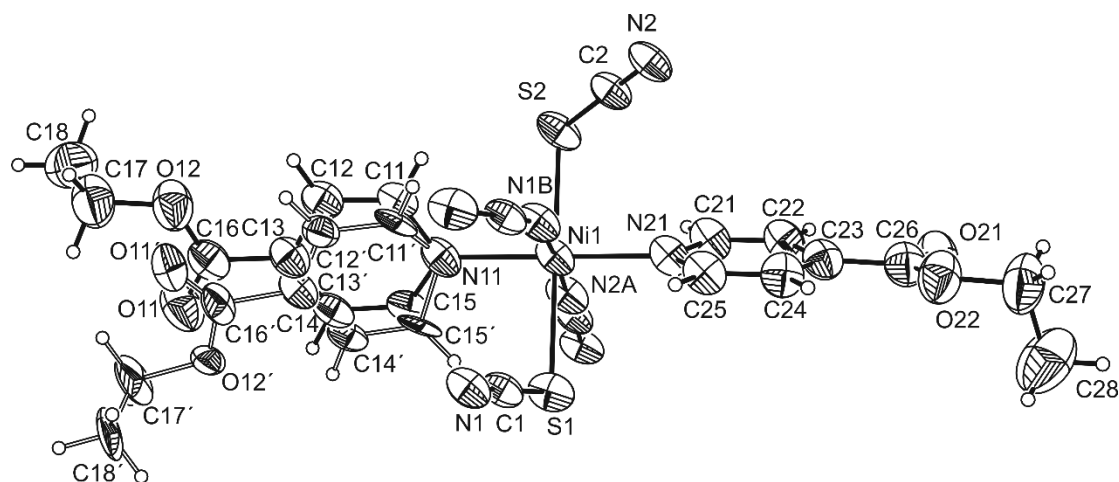

Fig. S7. ORTEP plot of **2-Ni** with labeling displacement ellipsoids drawn at the 50% probability level.



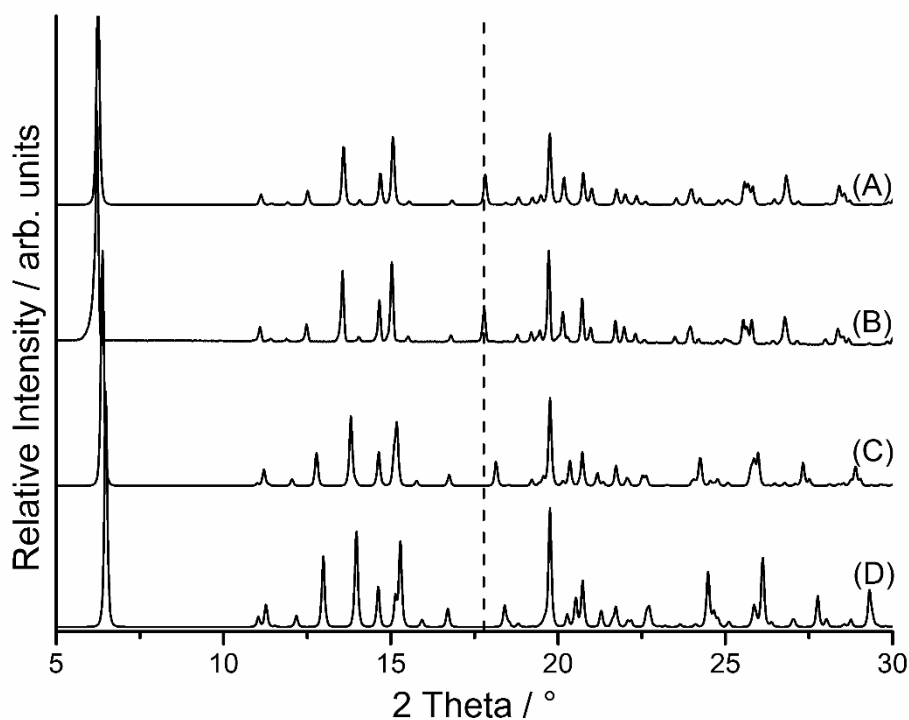

Fig. S8. XRPD patterns of **2-Ni** calculated from the Rietveld refinement (A), experimental XRPD pattern of **2-Ni** (B) and XRPD pattern of **2-Ni** calculated from single crystal data at room temperature (C) and at 170 K (D) ( $\lambda = 1.540596 \text{ \AA}$ ).

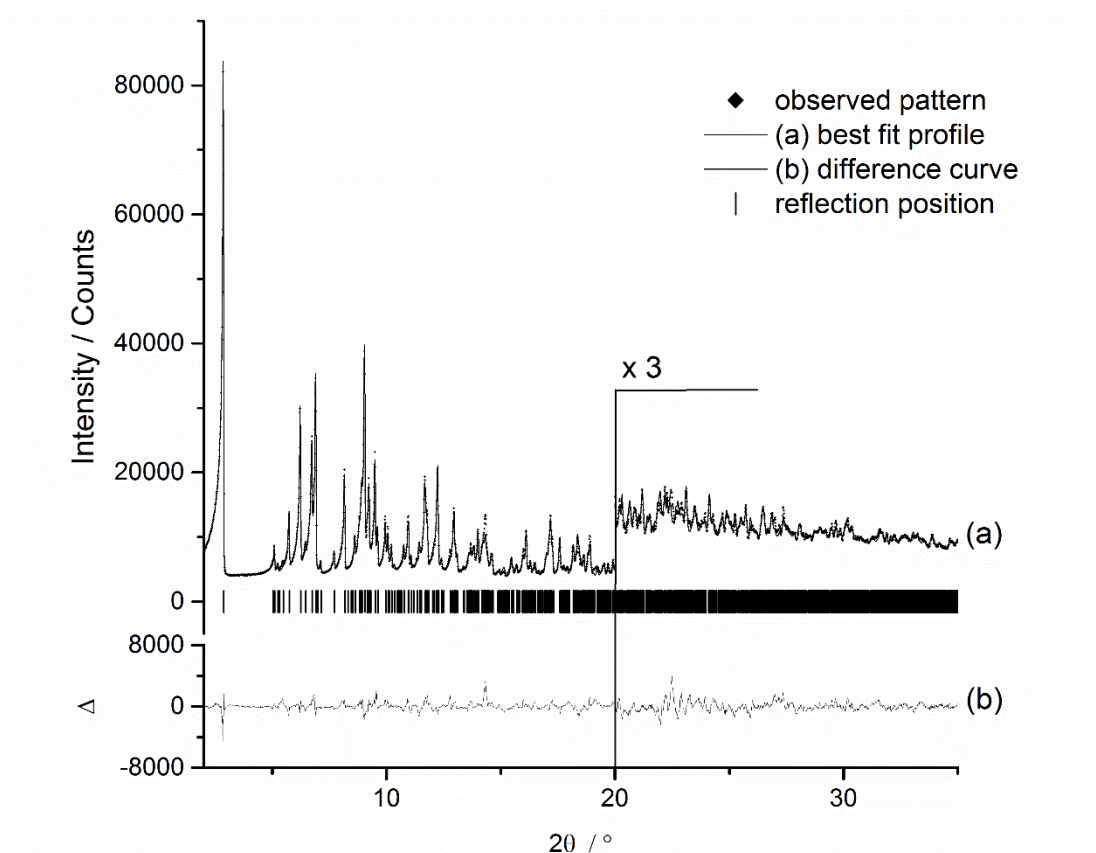

Fig. S9. Difference plot of **2-Ni** with calculated pattern shown as diamonds, best fit as black curve with the difference curve below ( $\lambda = 0.7093 \text{ \AA}$ ).

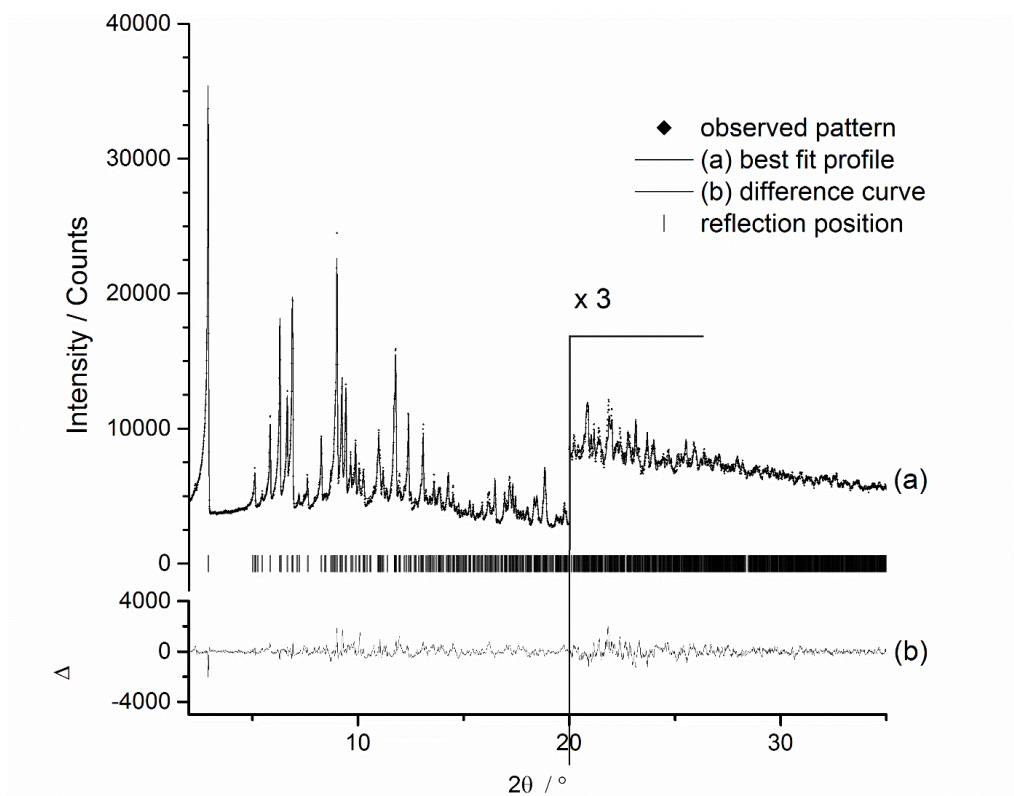

Fig. S10. Difference plot of **2-Co** with calculated pattern shown as diamonds, best fit as black curve with the difference curve below ( $\lambda = 0.7093 \text{ \AA}$ ).

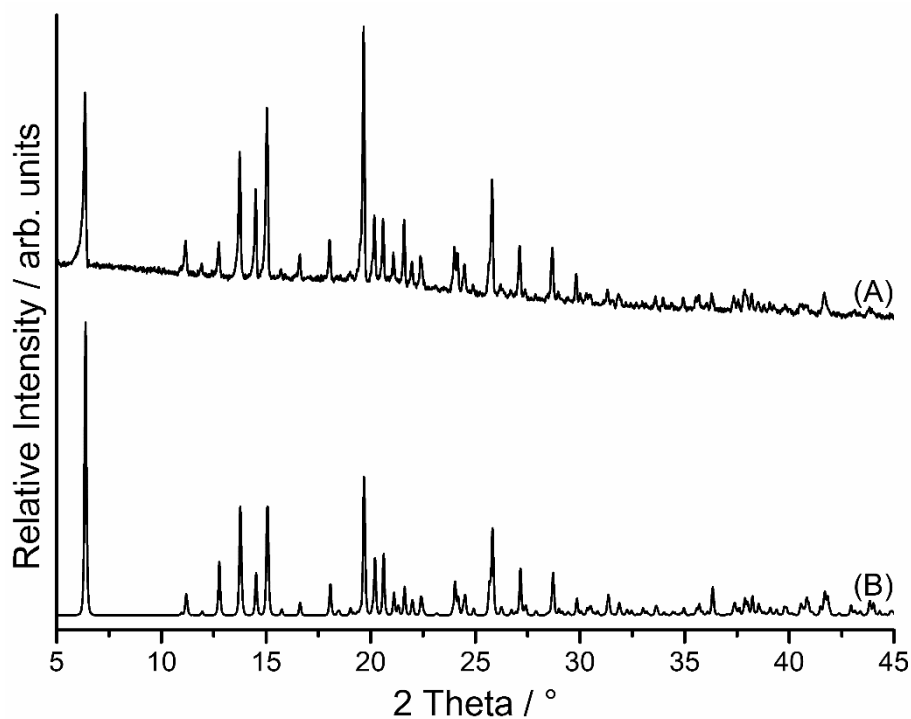

Fig. S11. Experimental (A) and calculated (B) XRPD patterns of **2-Co** ( $\lambda = 1.540596 \text{ \AA}$ ).

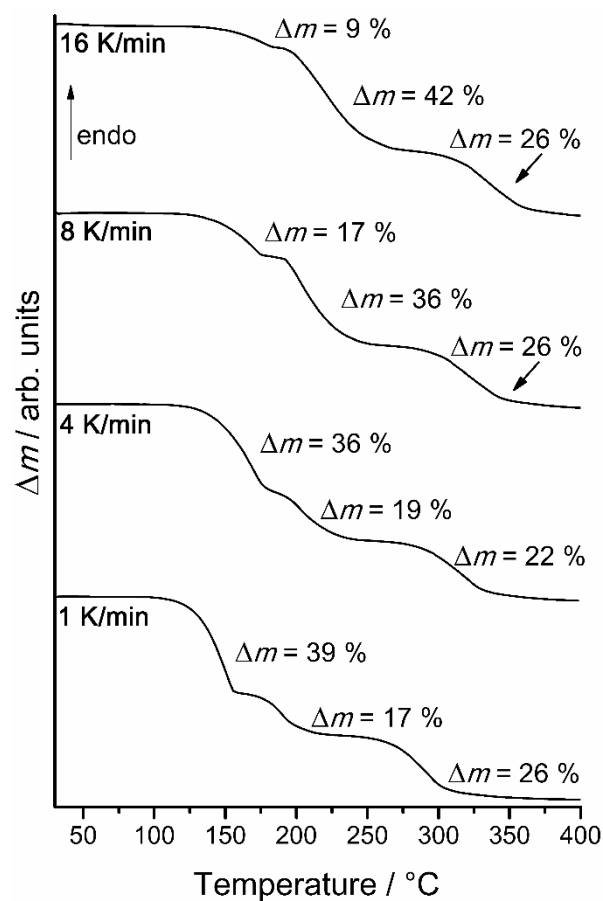

Fig. 3. Heating rate dependent TG measurements for **1-Co**.

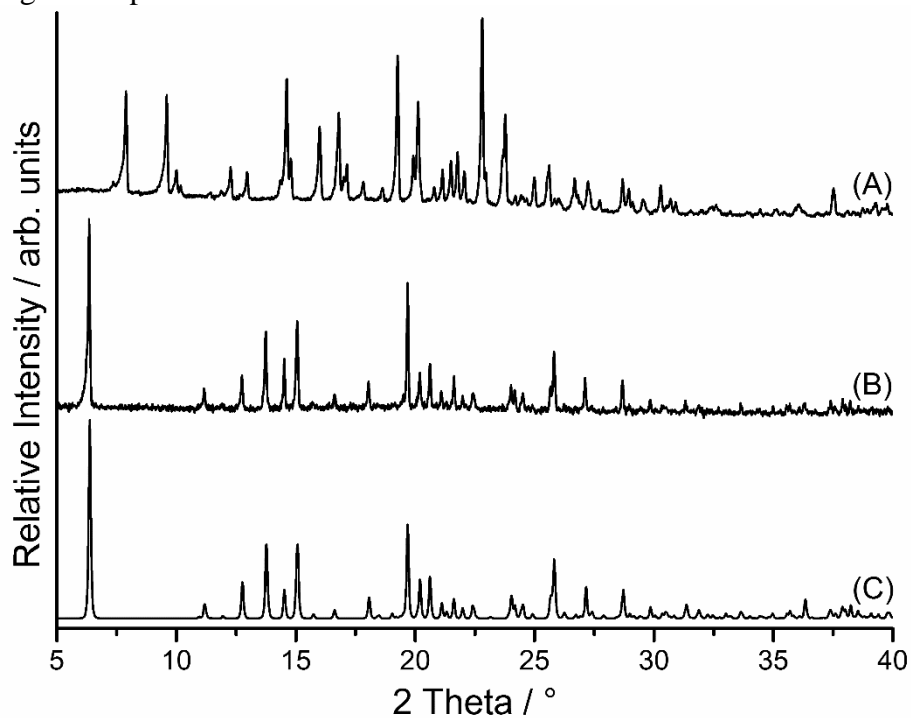

Fig. S13. Experimental XRPD patterns of **1-Co** (A), the residue obtained after the first mass step of **1-Co** (B), and the calculated XRPD pattern of **2-Co** (C) ( $\lambda = 1.540596 \text{ \AA}$ ).

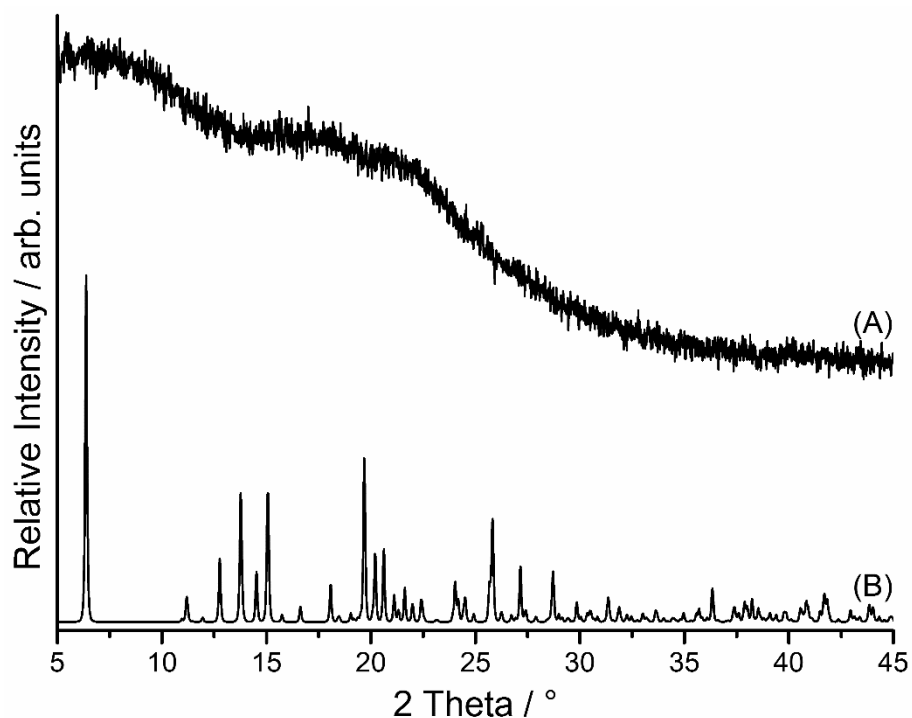

Fig. S14. Experimental XRPD patterns of the residue obtained after the second mass step of **1-Co** (A), and the calculated XRPD pattern of **2-Co** (B) ( $\lambda = 1.540596 \text{ \AA}$ ).

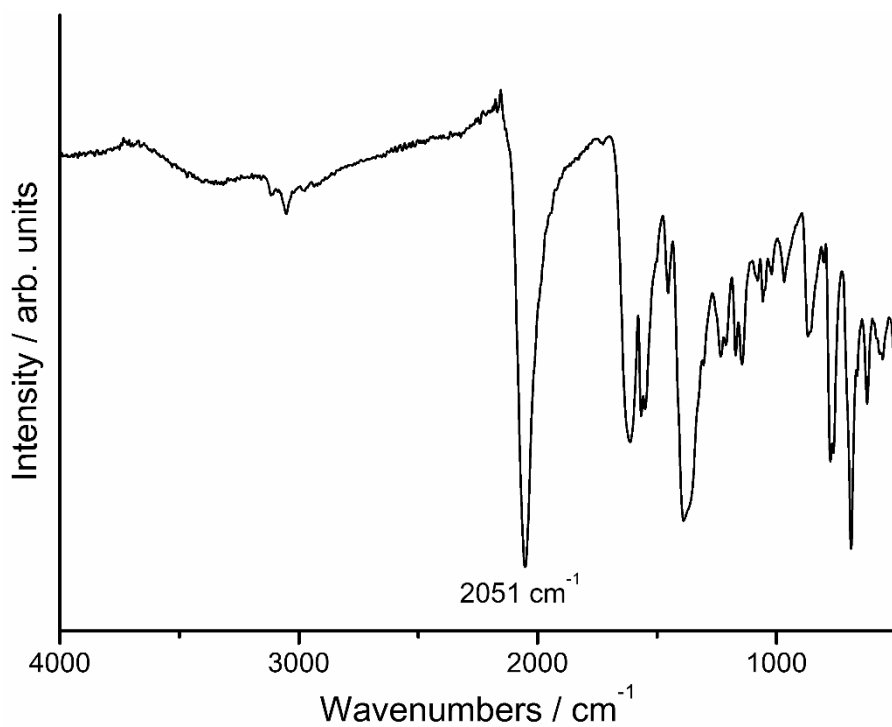

Fig. S15 IR spectra of the residue obtained after the second mass step of **1-Co**. Given is the value for the CN stretching vibration of the thiocyanato anion.

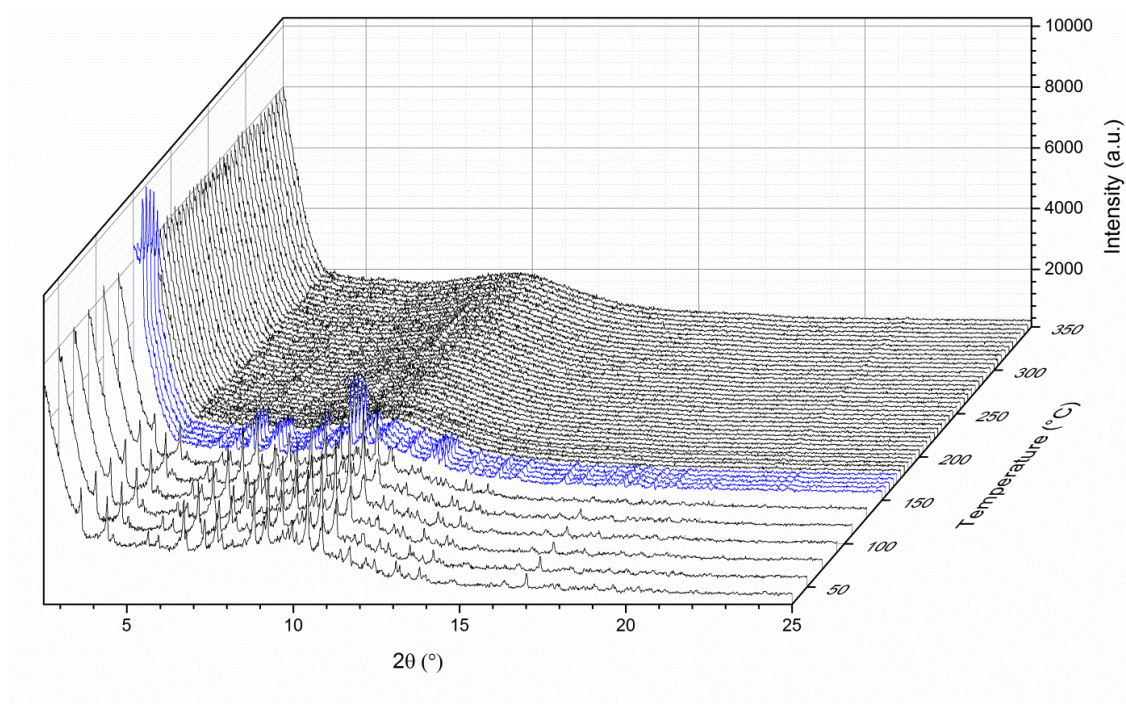

Fig. S16. Temperature dependent XRPD measurement for **1-Co**. The different phases are colored in black (**1-Co**) and blue (**2-Co**), respectively. Above 180 °C no intensity was observed ( $\lambda = 0.7093 \text{ \AA}$ ).

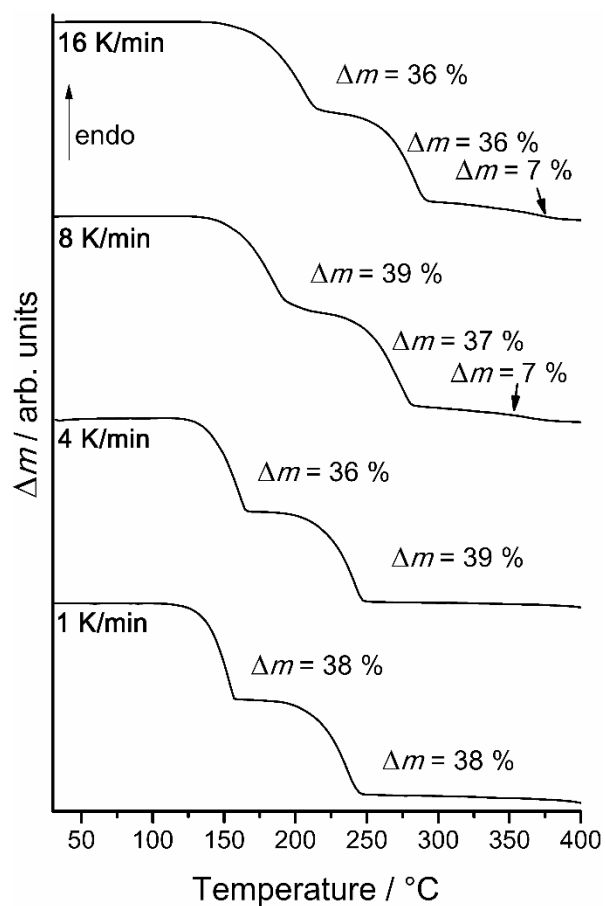

Fig. S17. Heating rate dependent TG curves for **1-Ni**.



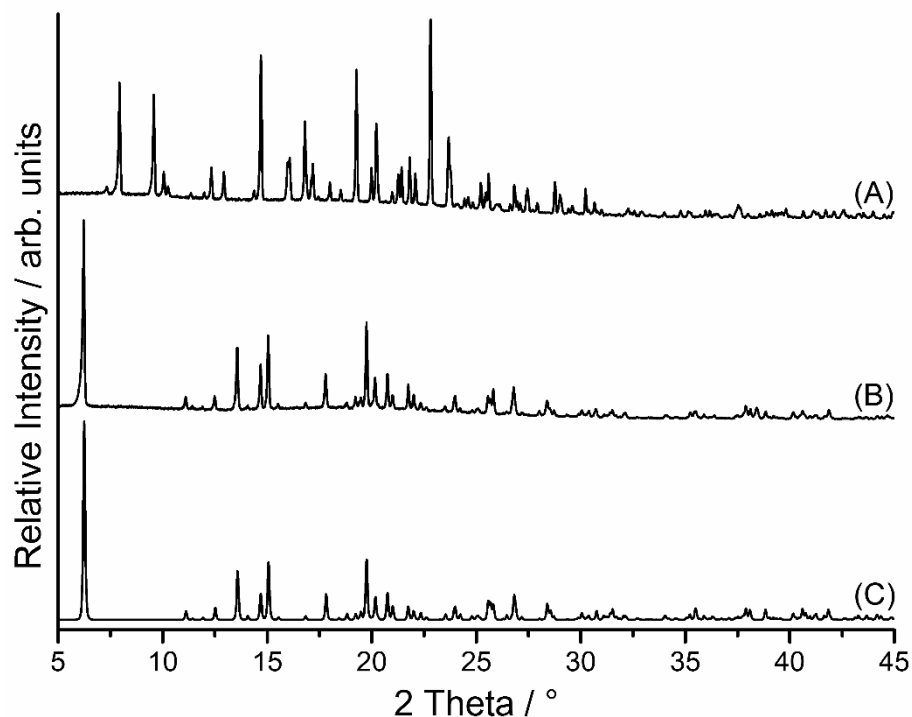

Fig. S18. Experimental XRPD patterns of **1-Ni** (A), the residue obtained after the first mass step of **1-Ni** (B) and the calculated XRPD pattern of **2-Ni** (C) ( $\lambda = 1.540596 \text{ \AA}$ ).

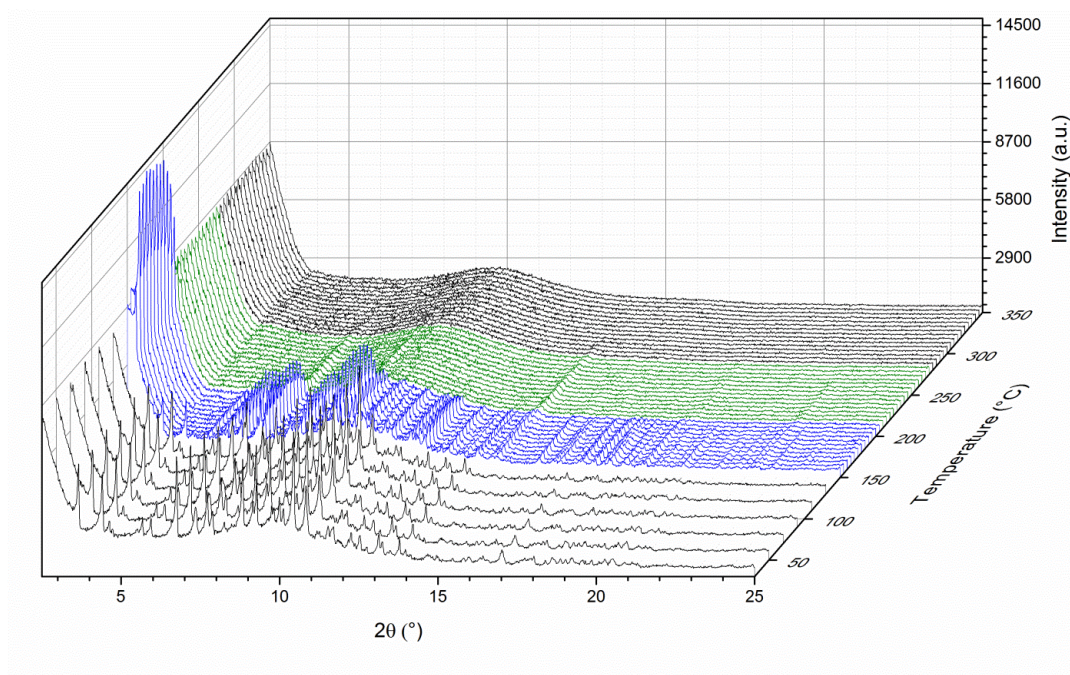

Fig. S19. Temperature dependent XRPD measurement for **1-Ni**. The different phases are colored in black (**1-Ni**), blue (**2-Ni**) and green (nickel thiocyanate complex), respectively. Above 290 °C no intensity was observed ( $\lambda = 0.7093 \text{ \AA}$ ).

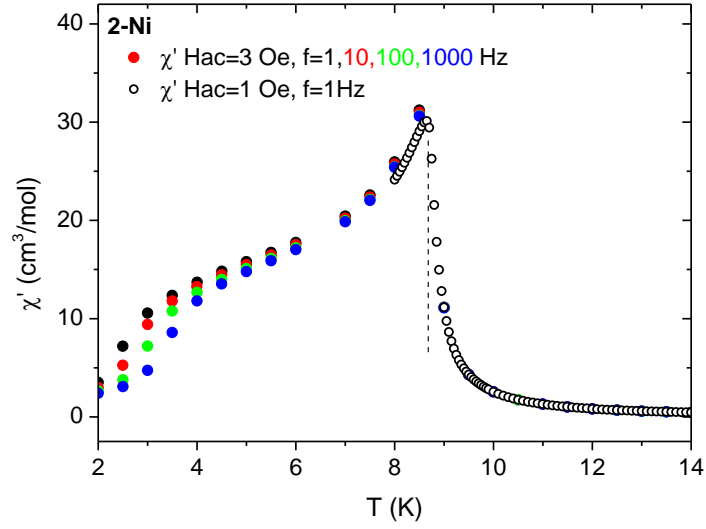

Fig. S20. The in-phase component  $\chi'$  of AC susceptibility measured for **2-Ni** using different AC frequencies. The dashed line is drawn at  $T_c = 8.70$  K as determined from specific heat measurements.

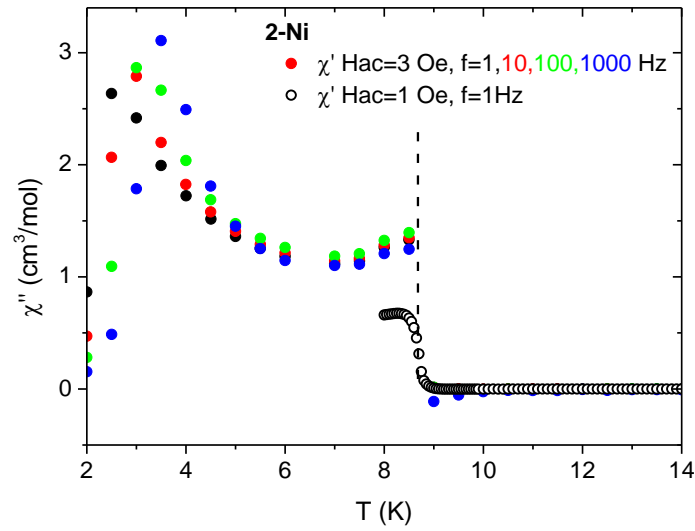

Fig. S21. The out-of-phase component  $\chi''$  of AC susceptibility measured for **2-Ni** using different AC frequencies. The dashed line is drawn at 8.70 K in all related figures.

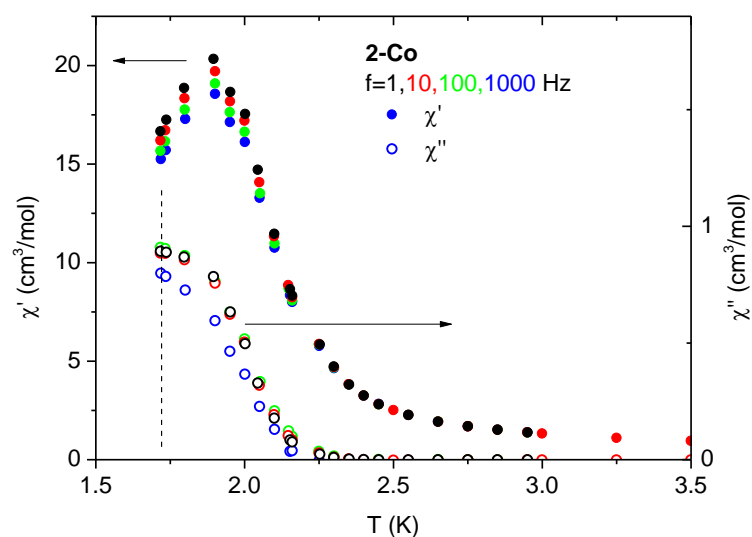

Fig. S22. AC susceptibility measured for **2-Co**. The dashed line is drawn at  $T_c = 1.72$  K as determined from specific heat measurements. The maximum of  $\chi'$  is slightly above  $T_c$ .

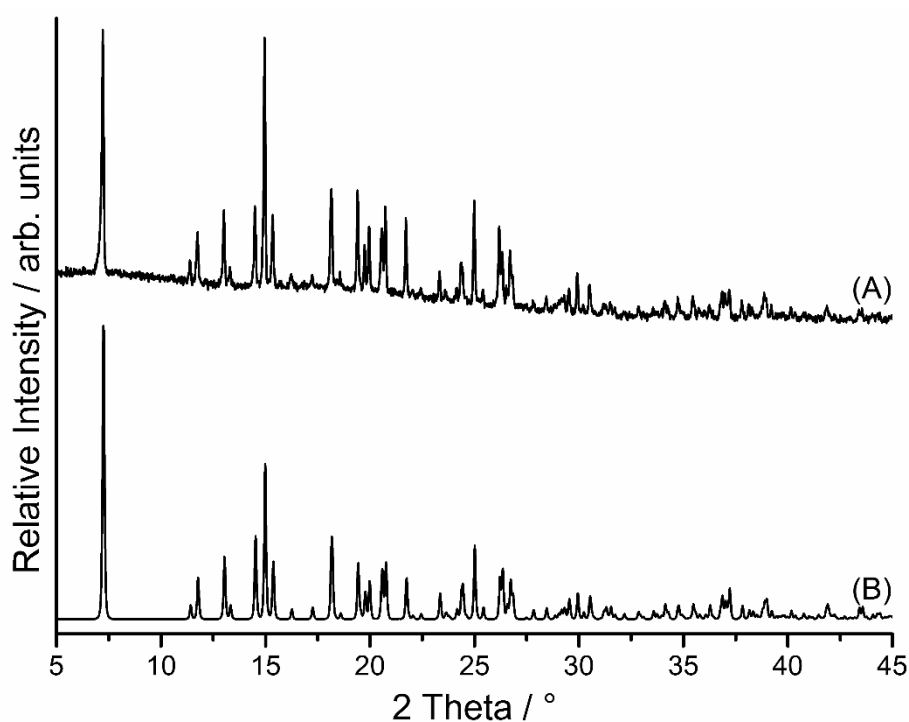

Fig. S23. Experimental (A) and calculated (B) XRPD patterns for 2D  $[\text{Co}(\text{NCS})_2(4\text{-acetylpyridine})_2]_n$  ( $\lambda = 1.540596$  Å).



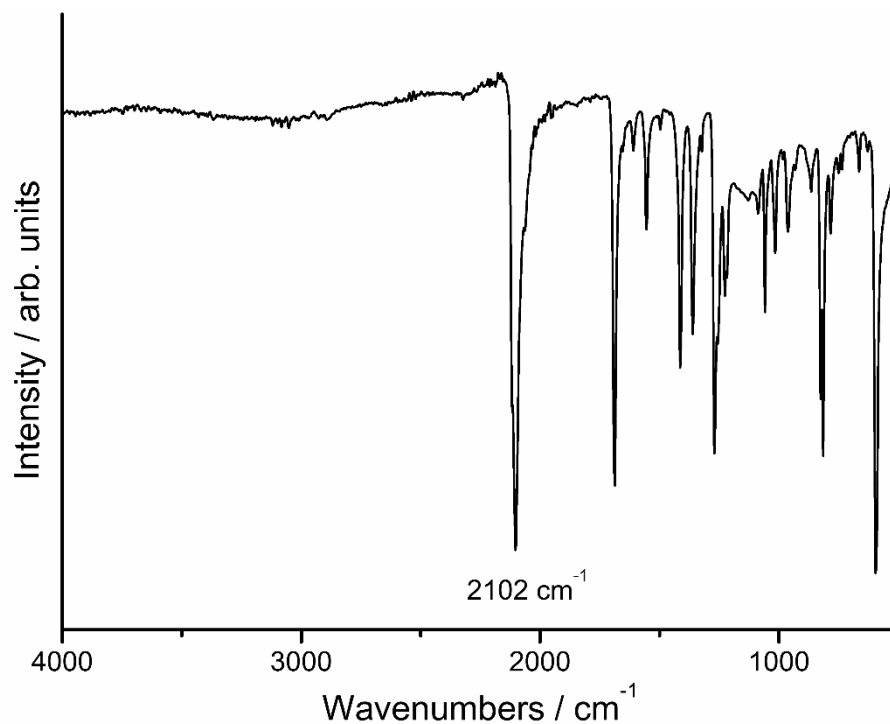

Fig. S24. IR spectra for 2D  $[\text{Co}(\text{NCS})_2(4\text{-acetylpyridine})_2]_n$ . Given is the value for the CN stretching vibration of the thiocyanato anion.

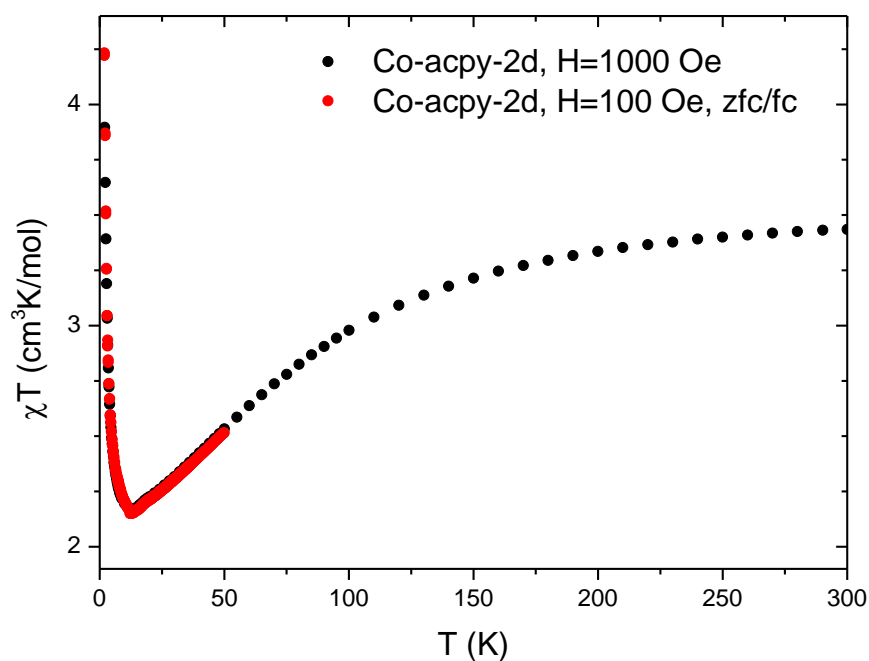

Fig. S25. Magnetic susceptibility as function of temperature of  $\text{Co}(\text{NCS})_2(4\text{-acetylpyridine})_2]_n$  measured at 100 and 1000 Oe.

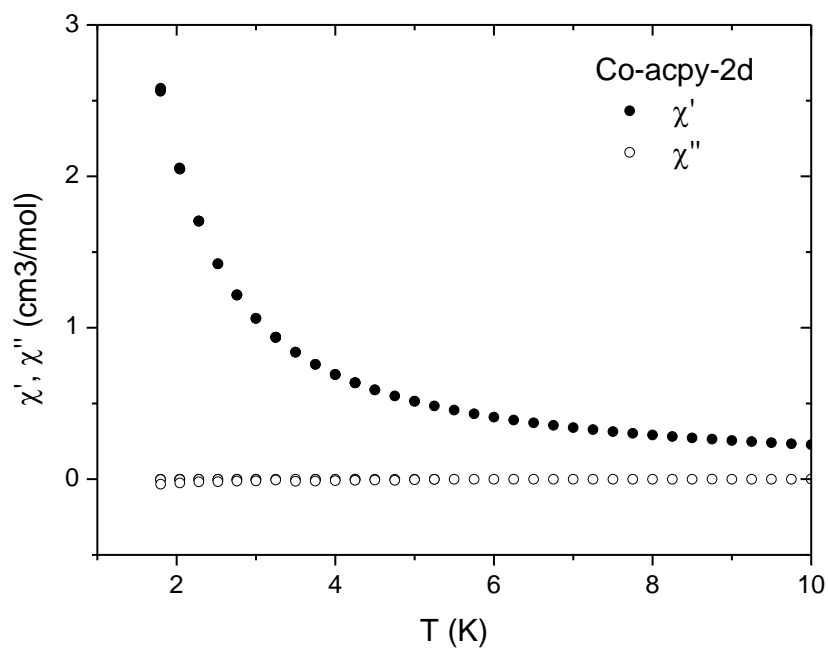

Fig. S26. AC susceptibility as function of temperature of  $\text{Co(NCS)}_2(4\text{-acetylpyridine})_2]_n$  measured at frequencies from 10 to 1000 Hz.

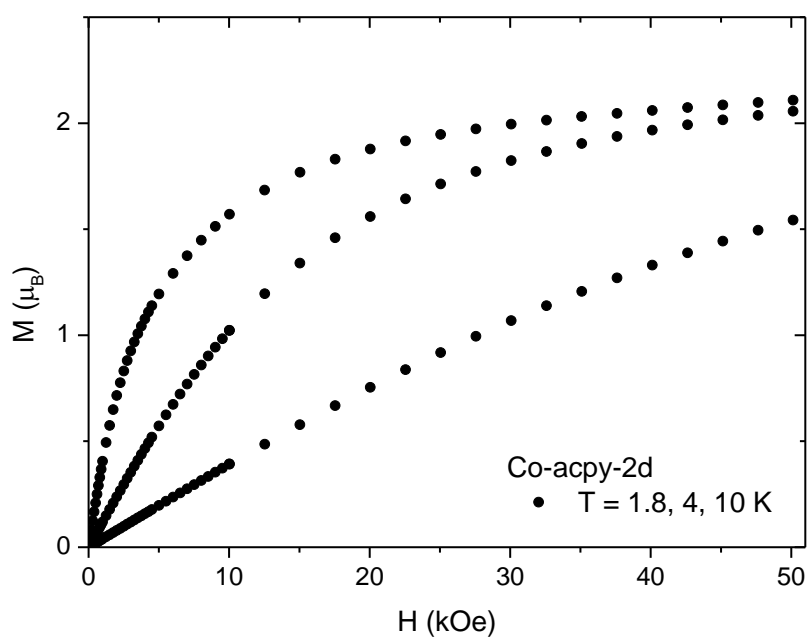

Fig. S27. Magnetization measurements of  $\text{Co(NCS)}_2(4\text{-acetylpyridine})_2]_n$  at different temperatures.

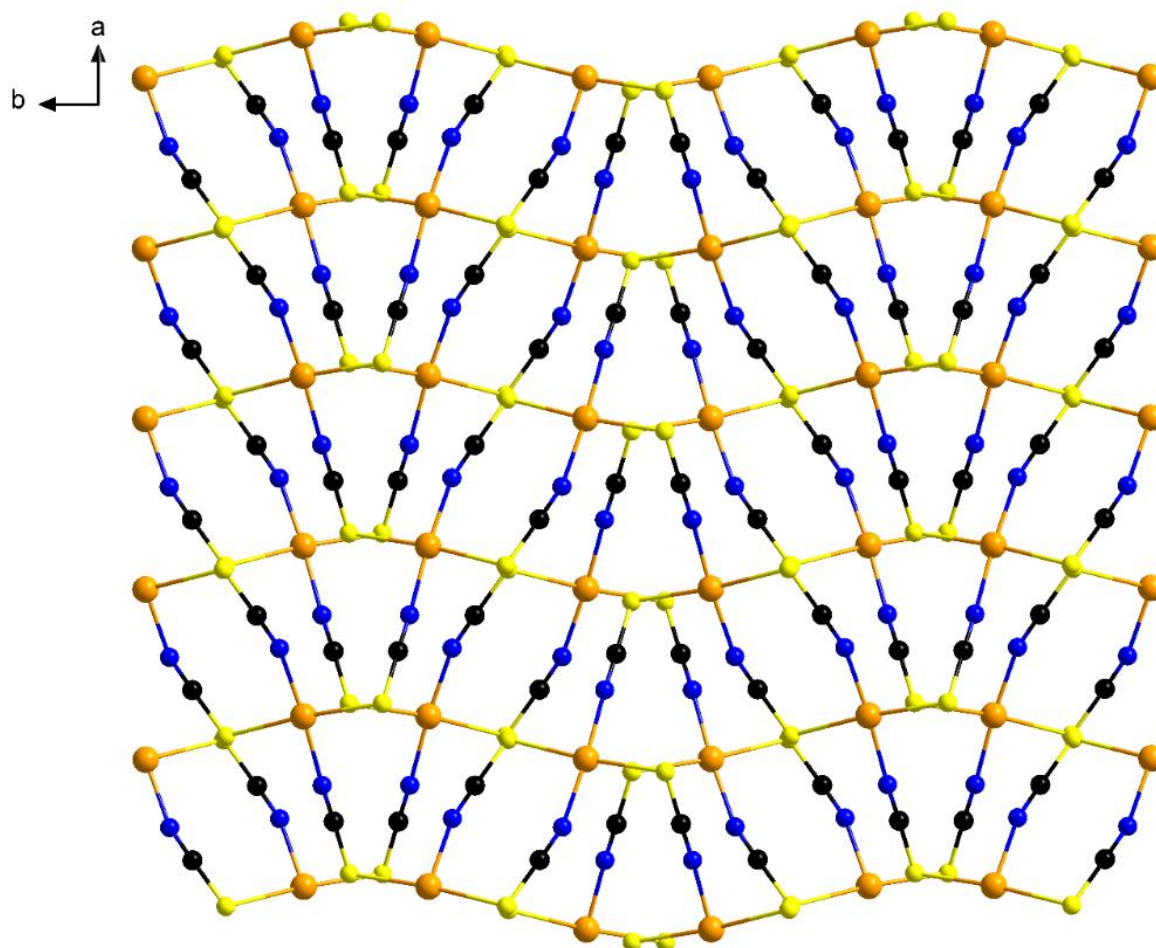

Fig. S28. View of the stacking of two layers in 2D  $[\text{Co}(\text{NCS})_2(4\text{-acetylpyridine})_2]_n$  along the crystallographic  $c$  axis.

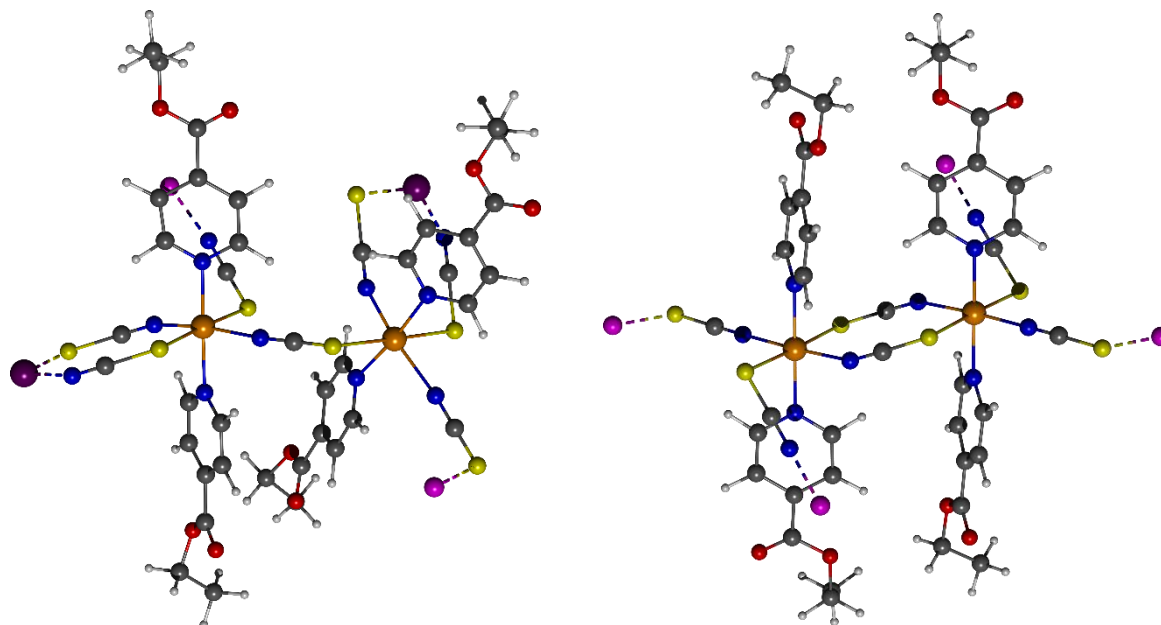

Fig. S29. Dinuclear model systems 1 (left) and 2 (right) for the two bridging modes observed in **2-Ni** and **2-Co** utilized in the CDFT calculations to obtain  $J_1$  and  $J_2$ , respectively. Pink (purple) spheres designate point charges of +0.5 (+1.0) to compensate negative charge of the fragments.

Table S4. CDFT Results for **2-Ni** and **2-Co**. Magnetic coupling constants have been calculated by equation (1).

|             |                       |       | $J / \text{K}$ | State | $2S+1$ | $E_{\text{rel}} / \text{a.u.}$ | $\langle S^2 \rangle$ |
|-------------|-----------------------|-------|----------------|-------|--------|--------------------------------|-----------------------|
| <b>2-Ni</b> | (single crystal)      | $J_1$ | 10.5           | HS    | 5      | -8515.871446                   | 6.0206                |
|             |                       |       |                | BS    | 1      | -8515.871181                   | 2.0199                |
|             |                       | $J_2$ | 7.7            | HS    | 5      | -8024.662003                   | 6.0158                |
|             |                       |       |                | BS    | 1      | -8024.661809                   | 2.0156                |
| <b>2-Ni</b> | (Rietveld)            | $J_1$ | 3.2            | HS    | 5      | -8516.134861                   | 6.0189                |
|             |                       |       |                | BS    | 1      | -8516.134780                   | 2.0189                |
|             |                       | $J_2$ | -14.2          | HS    | 5      | -8024.503091                   | 6.0182                |
|             |                       |       |                | BS    | 1      | -8024.503450                   | 2.0116                |
| <b>2-Co</b> | (Rietveld)            | $J_1$ | 40.9           | HS    | 7      | -8264.744437                   | 12.0311               |
|             |                       |       |                | BS    | 1      | -8264.742108                   | 3.0292                |
|             |                       | $J_2$ | 19.3           | HS    | 7      | -7773.057242                   | 12.0302               |
|             |                       |       |                | BS    | 1      | -7773.056142                   | 3.0266                |
| <b>2-Co</b> | (2-Ni single crystal) | $J_1$ | -42.2          | HS    | 7      | -8264.744373                   | 12.0311               |
|             |                       |       |                | BS    | 1      | -8264.746777                   | 3.0280                |
|             |                       | $J_2$ | -9.4           | HS    | 7      | -7773.541874                   | 12.0263               |
|             |                       |       |                | BS    | 1      | -7773.542412                   | 3.0247                |

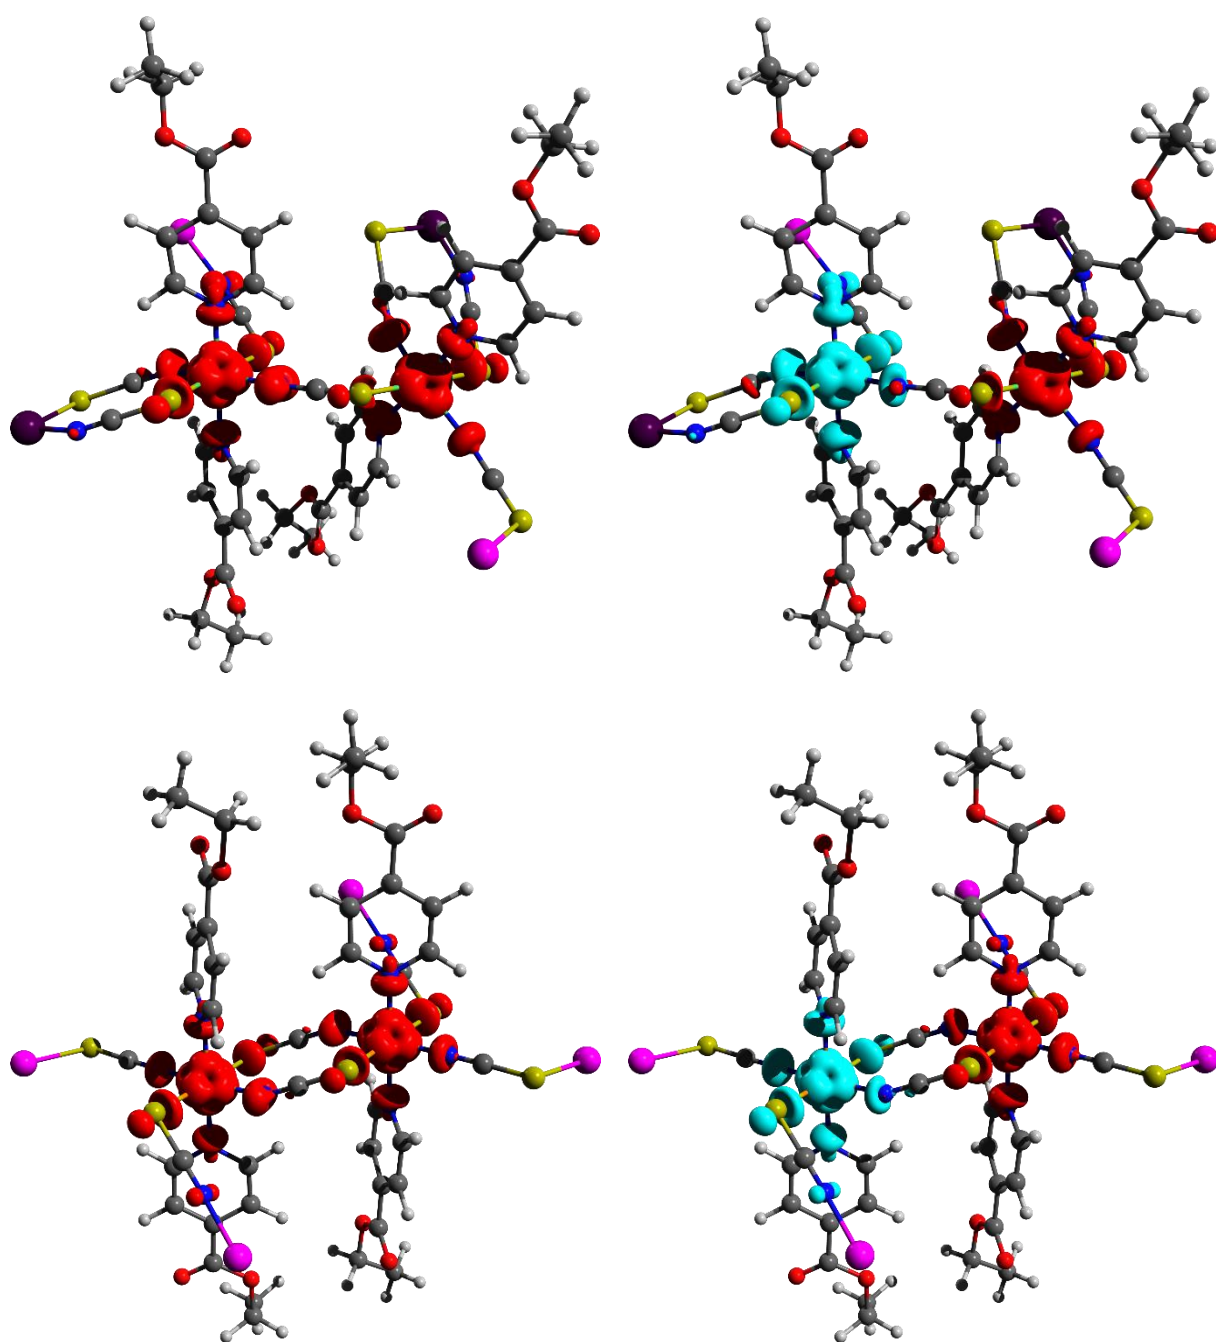

Fig. S30. CDFT spin densities of **2-Ni** for high-spin (left column) and broken-symmetry (right column) states. Red (cyan) isosurfaces represent net  $\alpha$  ( $\beta$ ) spin densities (iso-value 0.004). First and second row represents the computational model for magnetic coupling constants  $J_1$  and  $J_2$ , respectively.

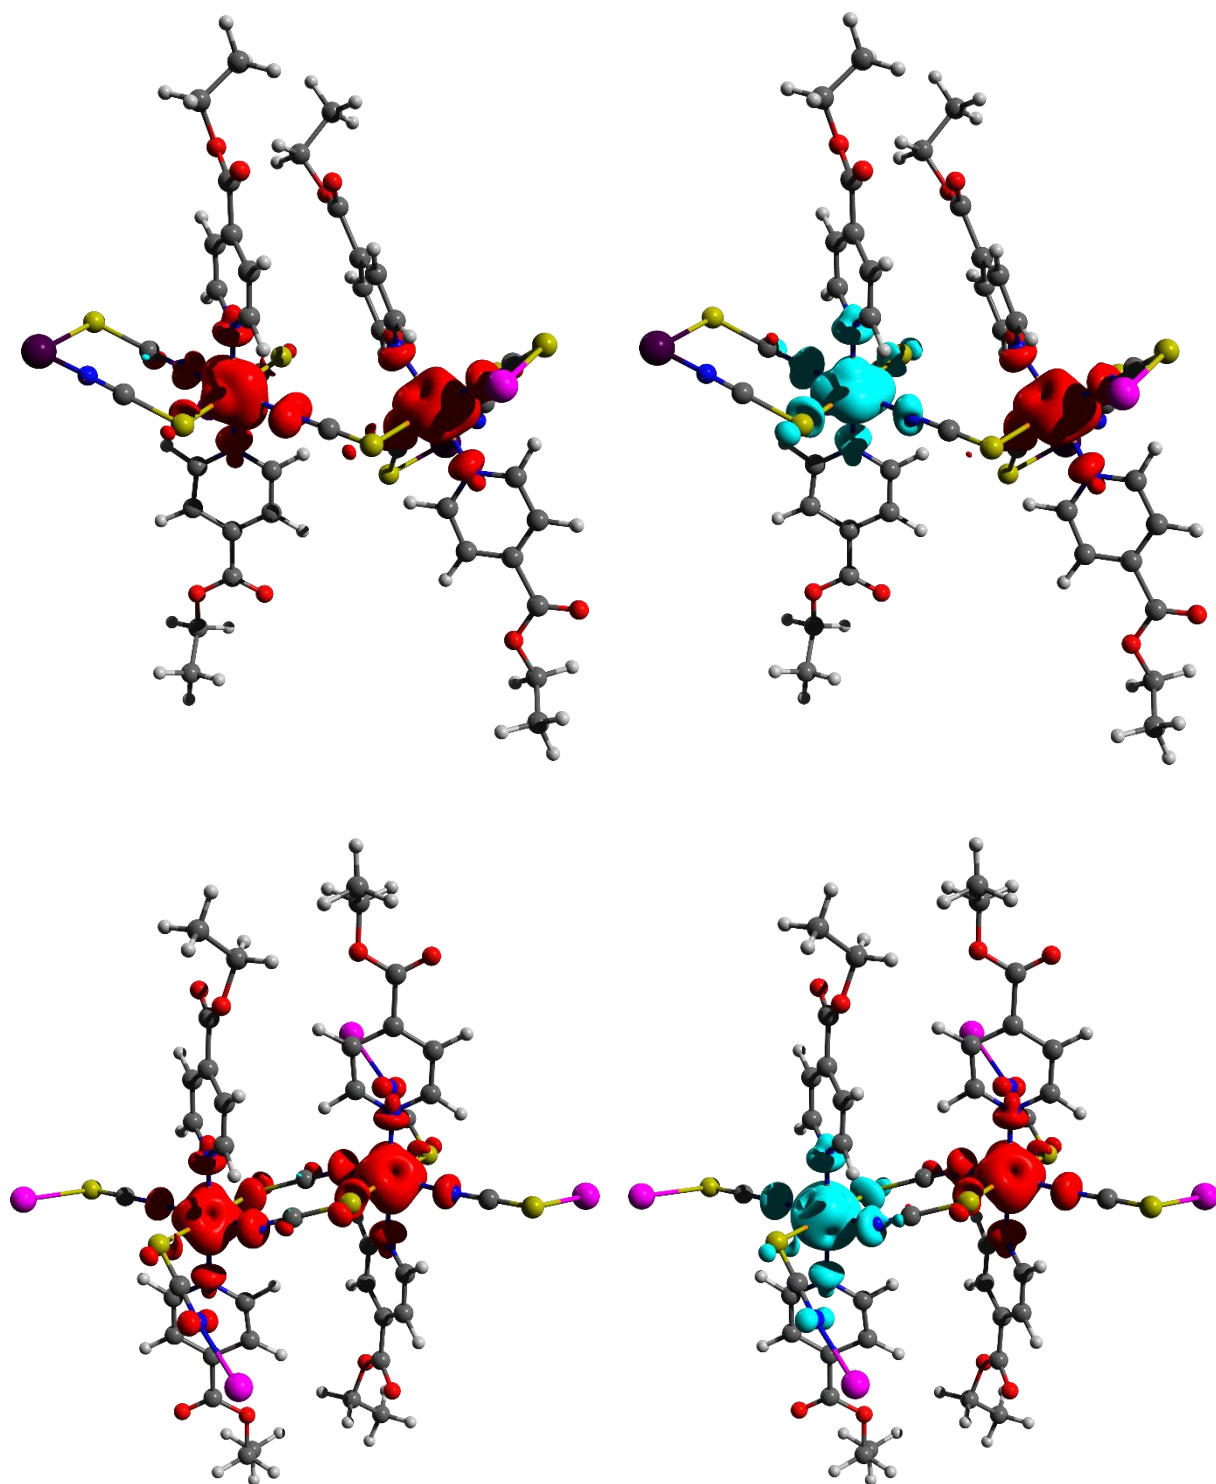

Fig. S31. CDFT spin densities of **2-Co** for high-spin (left column) and broken-symmetry (right column) states. Red (cyan) isosurfaces represent net  $\alpha$  ( $\beta$ ) spin densities (iso-value 0.004). First and second row represents the computational model for magnetic coupling constants  $J_1$  and  $J_2$ , respectively.

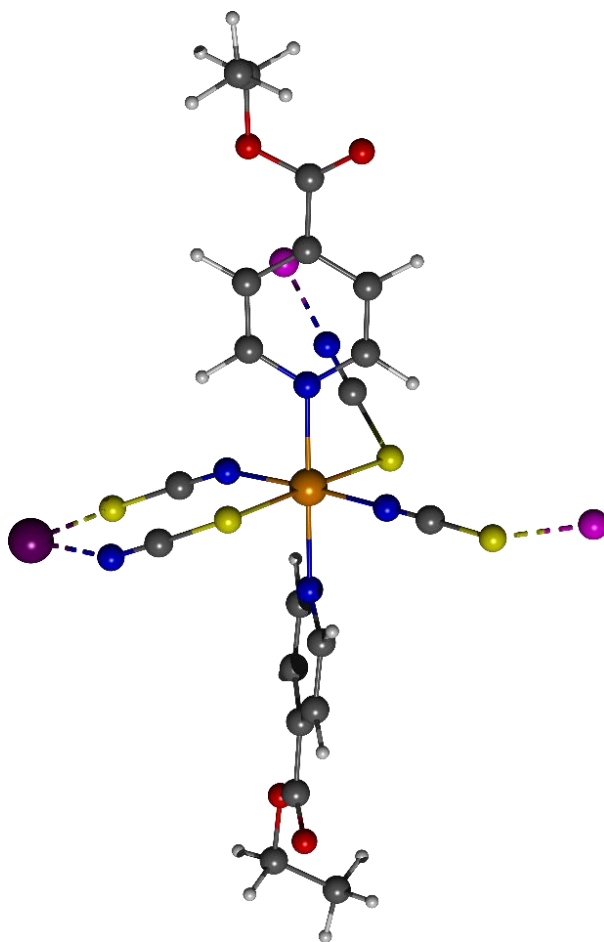

Fig. S32. Computational model used for the *ab initio* calculations. Pink and purple spheres designate point charges of +0.5 and +1.0, respectively, to compensate negative charges of the fragment.

Table S5. Relative CASSCF and CASPT2 energies (in  $\text{cm}^{-1}$ ) for **2-Ni** and **2-Co**.

| <b>2-Ni</b><br>(single crystal) |              |        |        | <b>2-Co</b><br>(Rietveld) |                           |        |        |
|---------------------------------|--------------|--------|--------|---------------------------|---------------------------|--------|--------|
| 2S+1                            | Term         | CASSCF | CASPT2 | 2S+1                      | Term                      | CASSCF | CASPT2 |
| 3                               | $^3\text{F}$ | 0      | 0      | 4                         | $^4\text{F}$              | 0      | 0      |
|                                 |              | 6884   | 8076   |                           |                           | 198    | 172    |
|                                 |              | 7029   | 8171   |                           |                           | 436    | 469    |
|                                 |              | 9494   | 10823  |                           |                           | 5887   | 7088   |
|                                 |              | 12792  | 13522  |                           |                           | 9457   | 10681  |
|                                 |              | 13952  | 15801  |                           |                           | 9863   | 11012  |
|                                 |              | 14186  | 16090  |                           |                           | 18372  | 20885  |
|                                 | $^3\text{P}$ | 27084  | 24800  |                           | $^4\text{P}$              | 22733  | 20627  |
|                                 |              | 28703  | 25802  |                           |                           | 22951  | 20942  |
|                                 |              | 28956  | 25912  |                           |                           | 27397  | 25292  |
| 1                               | $^1\text{D}$ | 17247  | 14131  | 2                         | $^2\text{G} + ^2\text{P}$ | 9144   | 5956   |
|                                 |              | 18107  | 14768  |                           |                           | 14335  | 11050  |
|                                 |              | 24411  | 22725  |                           |                           | 16455  | 14323  |
|                                 |              | 24479  | 22740  |                           |                           | 16849  | 14547  |
|                                 |              | 26549  | 24830  |                           |                           | 18818  | 15940  |
|                                 | $^1\text{G}$ | 29236  | 24570  |                           |                           | 19611  | 16583  |
|                                 |              | 29342  | 27218  |                           |                           | 20002  | 16924  |
|                                 |              | 32673  | 30221  |                           |                           | 21226  | 18028  |
|                                 |              | 33043  | 30615  |                           |                           | 23814  | 20471  |
|                                 |              | 36606  | 35889  |                           |                           | 24127  | 20869  |
|                                 |              | 37198  | 36398  |                           |                           | 24769  | 20583  |
|                                 |              | 37336  | 36738  |                           |                           | 25431  | 23790  |
|                                 |              | 37438  | 36875  |                           | ...                       | ...    | ...    |
|                                 |              | 38092  | 37190  |                           |                           |        |        |
|                                 | $^1\text{S}$ | 68420  | 55750  |                           |                           |        |        |

Table S6. Relative RASSI-SO energies (in  $\text{cm}^{-1}$ ) for the lowest spin-orbit coupled states in **2-Ni** and **2-Co** whereas in the latter case degenerated Kramers doublets (KDs) are obtained.

| <b>2-Ni</b><br>(single crystal) |       |                                   | <b>2-Co</b><br>(Rietveld) |          |                                   |
|---------------------------------|-------|-----------------------------------|---------------------------|----------|-----------------------------------|
| Subterm                         | State | $E_{\text{rel}} / \text{cm}^{-1}$ | Subterm                   | KD State | $E_{\text{rel}} / \text{cm}^{-1}$ |
| $^3\text{A}_{2\text{g}}$        | 1     | 0.0                               | $^4\text{T}_{1\text{g}}$  | 1        | 0.0                               |
|                                 | 2     | 9.4                               |                           | 2        | 260.1                             |
|                                 | 3     | 10.1                              |                           | 3        | 464.5                             |
|                                 |       |                                   |                           | 4        | 868.3                             |
|                                 |       |                                   |                           | 5        | 1005.4                            |
|                                 |       |                                   |                           | 6        | 1146.3                            |



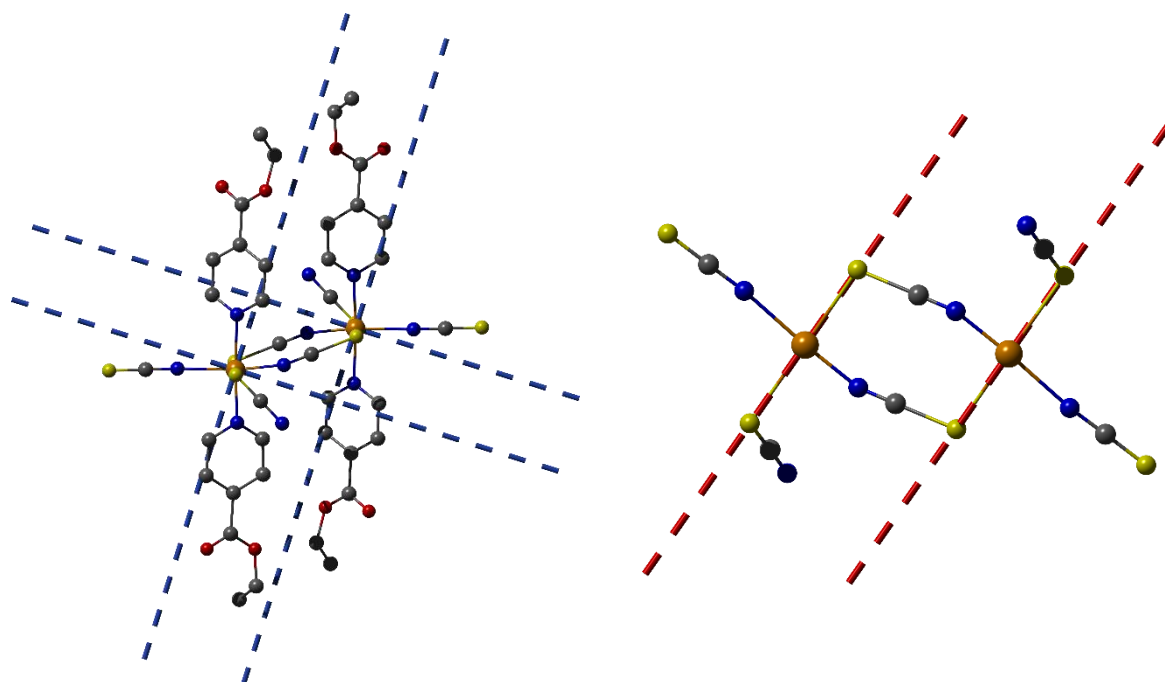

Fig. S33. *Ab initio* calculated ( $S_{\text{eff}}=1/2$ ) magnetic axes (blue dashed lines: axes defining the easy-plane; red dashed lines: hard-axes) for the first excited KD state of **2-Co** projected onto a dinuclear Co(II) fragment. Hydrogen atoms as well as pyridine-based co-ligands in top view (right) are omitted for clarity.

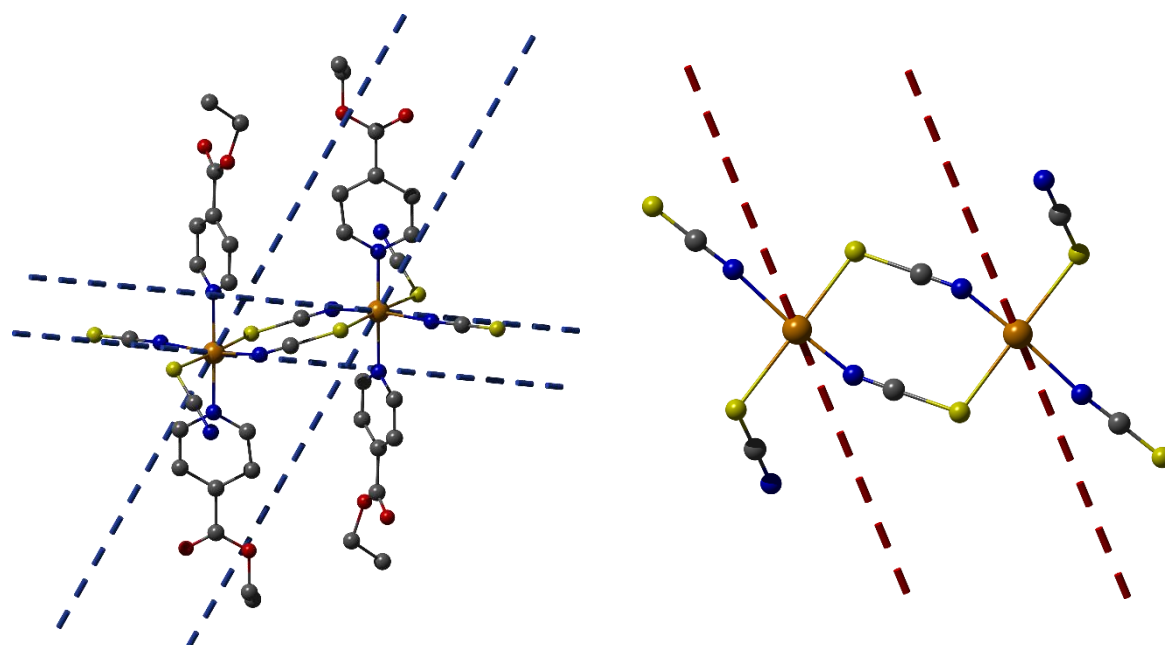

Fig. S34. *Ab initio* calculated ( $S_{\text{eff}}=3/2$ ) anisotropy axes (blue dashed lines: easy-axes; red dashed lines: hard-axes) for the two lowest KD states of **2-Co** projected onto a dinuclear Co(II) fragment. Hydrogen atoms as well as pyridine-based co-ligands in top view (right) are omitted for clarity.

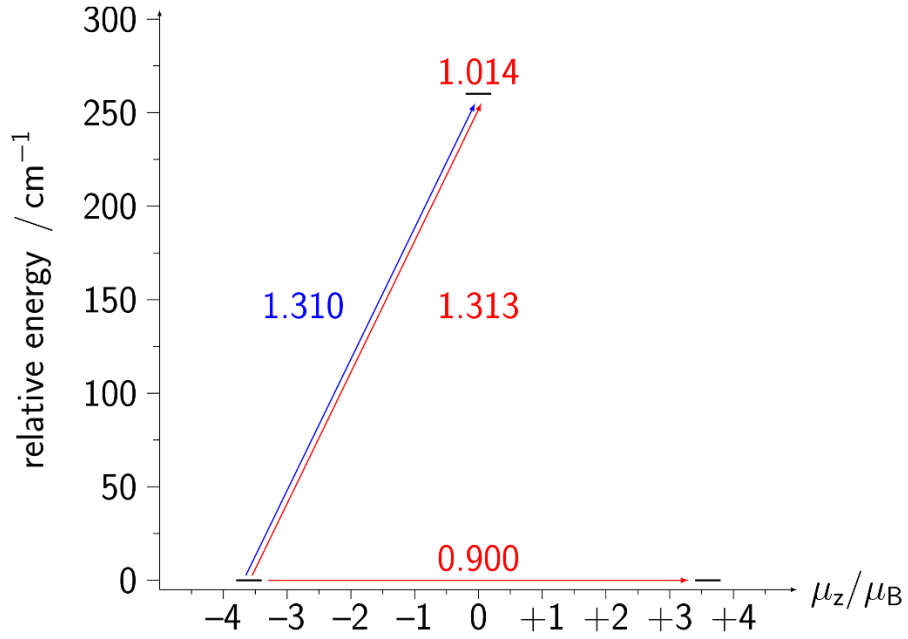

Fig. S35. Magnetization blocking barriers in **2-Co**. Arrows represent the transition between different magnetic states and corresponding values show the average dipole matrix element  $\bar{\mu}_z$

in respect to the ground state easy-axis orientation.

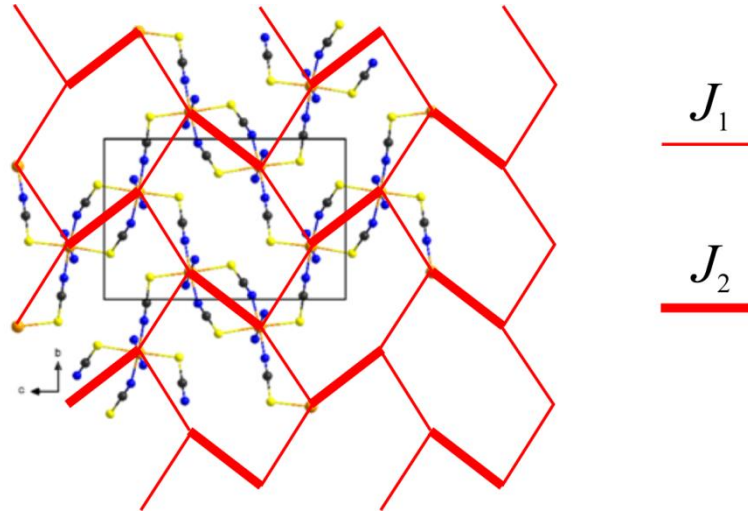

Fig. S36. Deformed chicken-wire lattice of exchange interaction paths between  $S = 1$  spins of Ni(II), as used in quantum Monte Carlo simulations to calculate magnetic susceptibility of **2-Ni**.
